# Supplementary material
Source: PubMed Central journal article supplement (PMC2141843)
Supplement: pnas_0707452104_1.pdf [file pnas_0707452104_1.pdf]

**A.****B,D,V,L**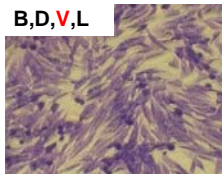**B,D,H,L**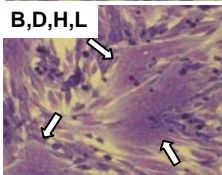**B,Dc,Hn,L**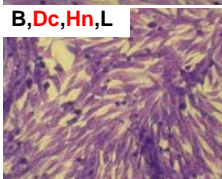**B.**

| constructs | syncytia |
|------------|----------|
| Bn         | +++      |
| Bc         | +++      |
| Dn         | +++      |
| Dc         | +++      |
| Hn         | +        |
| Hc         | ++       |
| Bn-Bc      | +++      |
| Dn-Dc      | +++      |
| Hn-Hc      | +        |
| Bn-Dc      | ++       |
| Bc-Dn      | ++       |
| Bn-Hc      | +        |
| Bc-Hn      | +        |
| Dn-Hc      | -        |
| Dc-Hn      | -        |
