# Supplementary material
Source: PubMed Central journal article supplement (PMC2141843)

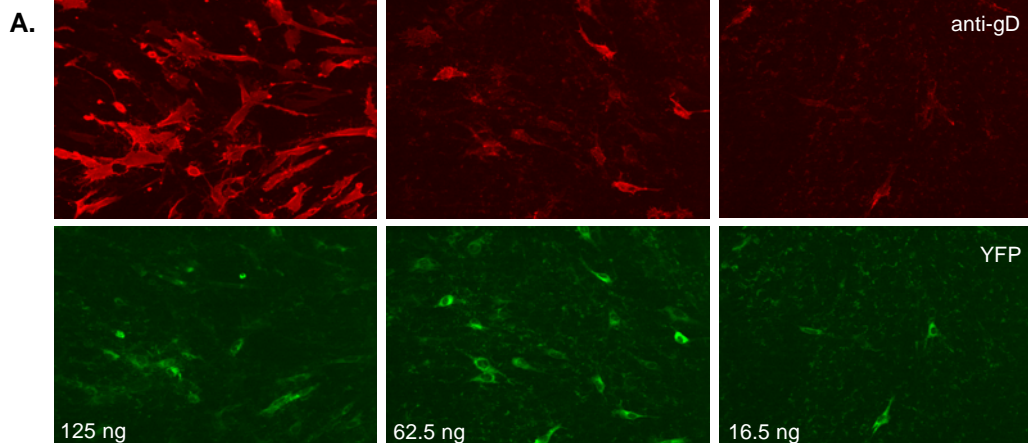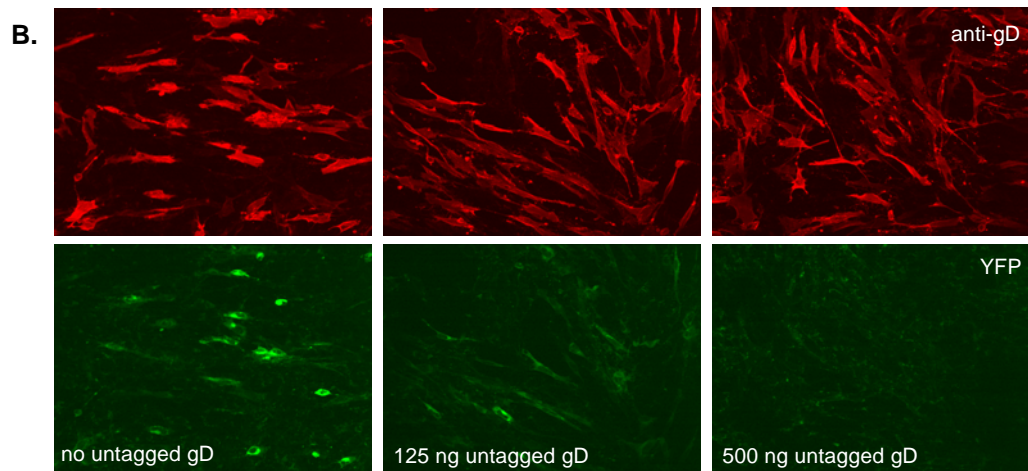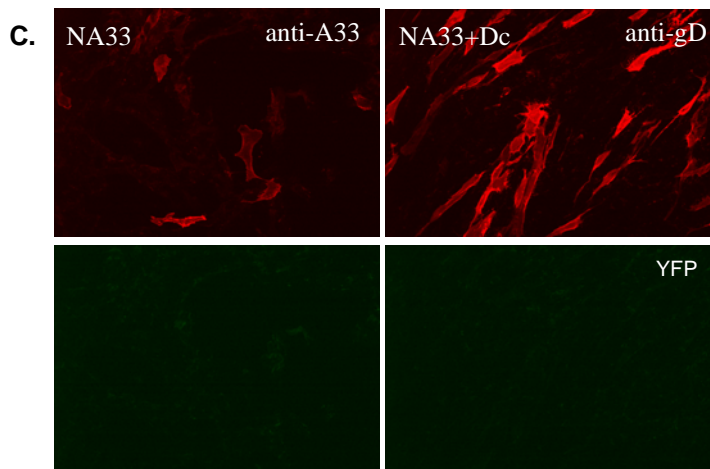

Supplement: pnas_0707452104_2.pdf [file pnas_0707452104_2.pdf]

anti-gB

YFP

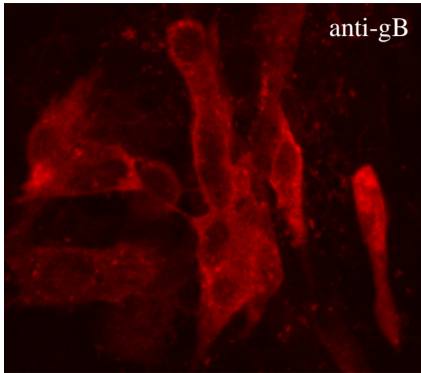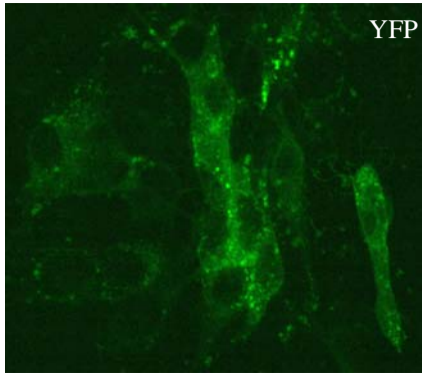

Supplement: pnas_0707452104_3.pdf [file pnas_0707452104_3.pdf]
